# Supplementary material
Source: publisher site journal article supplement (https://www.dovepress.com/article/444988)
Supplement: Supplementary file 1 [file get_supplementary_file.php]

**Supplementary Materials**


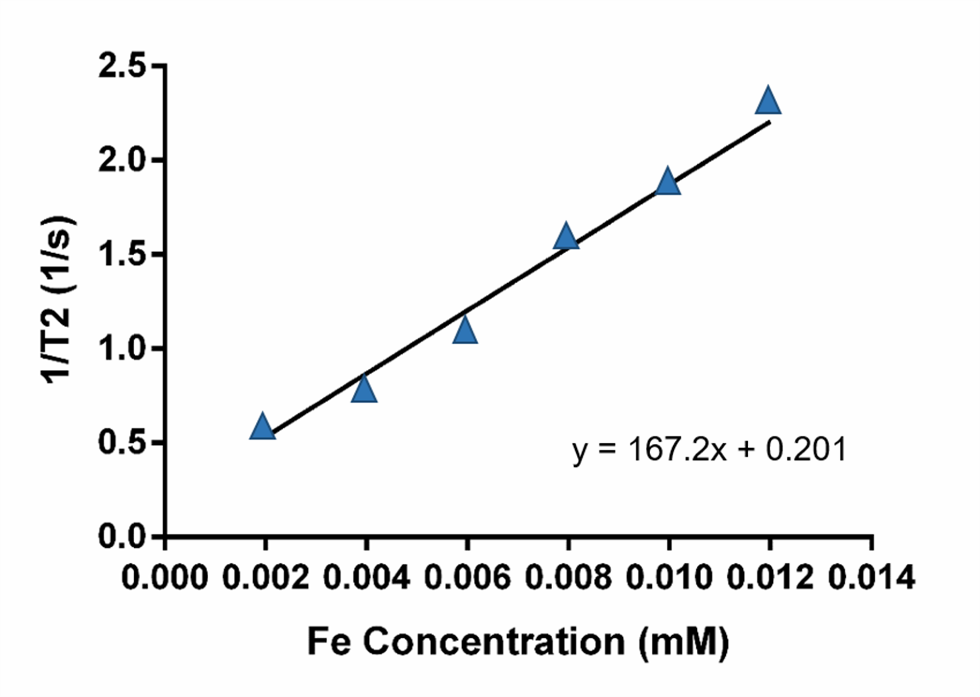


**Figure S1.**  Linear fitting of inverse T2 relaxation rate of uncoated PEG‑Fe3O4.





**Figure S2.** Cell viability after treatment with 50 nM CRda21-SPION. Error bars are representative of the standard deviation for each individual treatment. ns: not-statistically-significant.
